# Supplementary material for: Improvement of tribological and anti-corrosive performance of titanium surfaces coated with dicationic imidazolium-based ionic liquids
Source: Royal Society of Chemistry journal article supplement (doi:10.1039/c6ra13961b), 2016-01-01
Supplement: c6ra13961b1.pdf [file c6ra13961b1.pdf]

## Supplementary Information

# Improvement of tribological and anti-corrosive performance of titanium surfaces coated with dicationic imidazolium-based ionic liquids

Izabelle M. Gindri<sup>a</sup>, Danyal A. Siddiqui<sup>a</sup>, Clarissa P. Frizzo<sup>b</sup>, Marcos A. P. Martins<sup>b</sup>,  
Danieli C. Rodrigues<sup>a\*</sup>

<sup>a</sup>Department of Bioengineering, University of Texas at Dallas, Richardson, TX, 75080

<sup>b</sup>Department of Chemistry, Universidade Federal de Santa Maria, Santa Maria, Brazil – 97105

|                    |                                                                    |
|--------------------|--------------------------------------------------------------------|
| <b>Figure S1.</b>  | OCP of control Ti I and IL-coated I samples in PBS                 |
| <b>Figure S2.</b>  | OCP of control Ti I and IL-coated II samples in PBS                |
| <b>Figure S3.</b>  | OCP of control Ti I and IL-coated III samples in PBS               |
| <b>Figure S4.</b>  | OCP of control Ti I and IL-coated I samples in PBS-saliva          |
| <b>Figure S5.</b>  | OCP of control Ti I and IL-coated II samples in PBS-saliva         |
| <b>Figure S6.</b>  | OCP of control Ti I and IL-coated III samples in PBS-saliva        |
| <b>Figure S7.</b>  | OCP of control Ti I and IL-coated I samples in saliva              |
| <b>Figure S8.</b>  | OCP of control Ti I and IL-coated II samples in saliva             |
| <b>Figure S9.</b>  | OCP of control Ti I and IL-coated III samples in saliva            |
| <b>Figure S10.</b> | LPR of control Ti I and IL-coated I samples in PBS                 |
| <b>Figure S11.</b> | LPR of control Ti I and IL-coated II samples in PBS                |
| <b>Figure S12.</b> | LPR of control Ti I and IL-coated III samples in PBS               |
| <b>Figure S13.</b> | LPR of control Ti I and IL-coated I samples in PBS-saliva          |
| <b>Figure S14.</b> | LPR of control Ti I and IL-coated II samples in PBS-saliva         |
| <b>Figure S15.</b> | LPR of control Ti I and IL-coated III samples in PBS-saliva        |
| <b>Figure S16.</b> | LPR of control Ti I and IL-coated I samples in saliva              |
| <b>Figure S17.</b> | LPR of control Ti I and IL-coated II samples in saliva             |
| <b>Figure S18.</b> | LPR of control Ti I and IL-coated III samples in saliva            |
| <b>Figure S19.</b> | Anodic Tafel of control Ti I and IL-coated I samples in PBS        |
| <b>Figure S20.</b> | Anodic Tafel of control Ti I and IL-coated II samples in PBS       |
| <b>Figure S21.</b> | Anodic Tafel of control Ti I and IL-coated III samples in PBS      |
| <b>Figure S22.</b> | Anodic Tafel of control Ti I and IL-coated I samples in PBS-saliva |

|                    |                                                                      |
|--------------------|----------------------------------------------------------------------|
| <b>Figure S23.</b> | Anodic Tafel of control Ti I and IL-coated II samples in PBS-saliva  |
| <b>Figure S24.</b> | Anodic Tafel of control Ti I and IL-coated III samples in PBS-saliva |
| <b>Figure S25.</b> | Anodic Tafel of control Ti I and IL-coated I samples in saliva       |
| <b>Figure S26.</b> | Anodic Tafel of control Ti I and IL-coated II samples in saliva      |
| <b>Figure S27.</b> | Anodic Tafel of control Ti I and IL-coated III samples in saliva     |

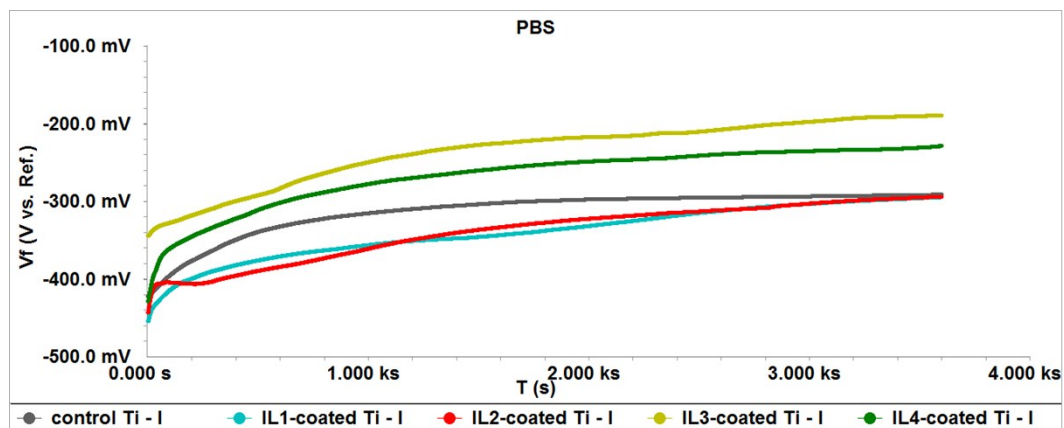

**Figure 1.** OCP of control Ti – I and IL-coated I samples in PBS.

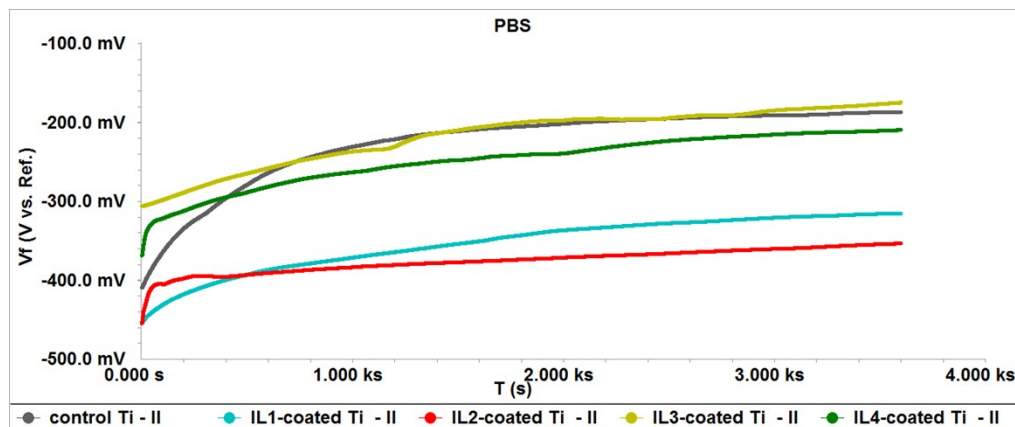

**Figure 2.** OCP of control Ti – II and IL-coated II samples in PBS.

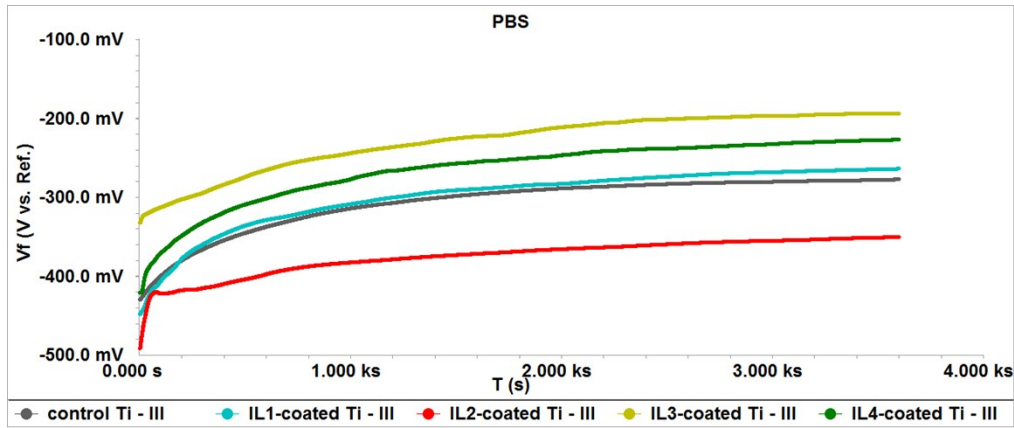

Figure 3. OCP of control Ti – III and IL-coated III samples in PBS.

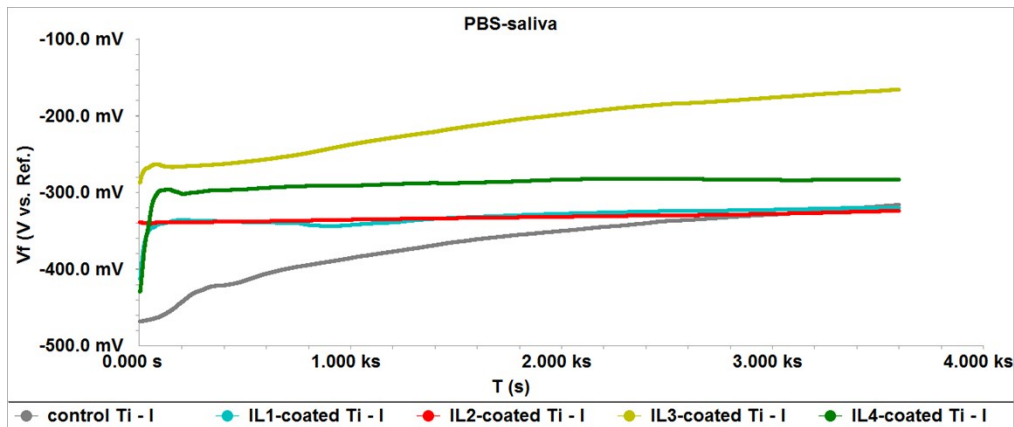

Figure 4. OCP of control Ti – I and IL-coated I samples in PBS-saliva.

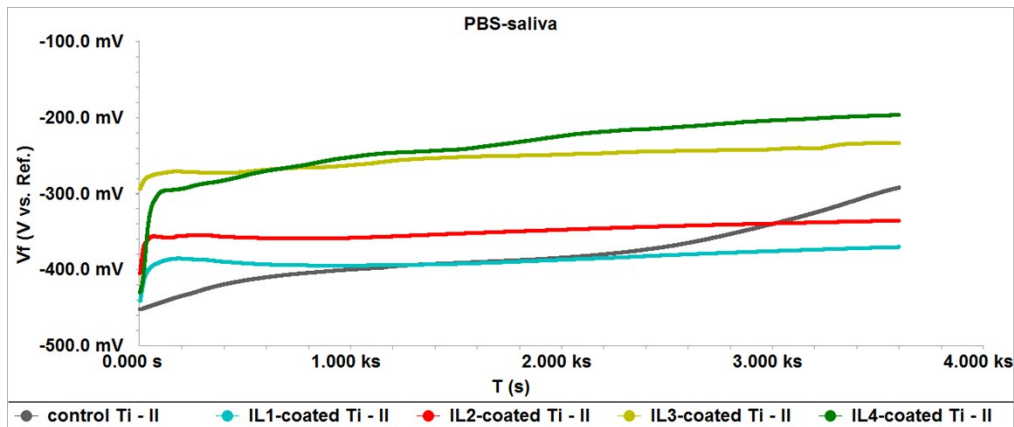

Figure 5. OCP of control Ti – II and IL-coated II samples in PBS-saliva.

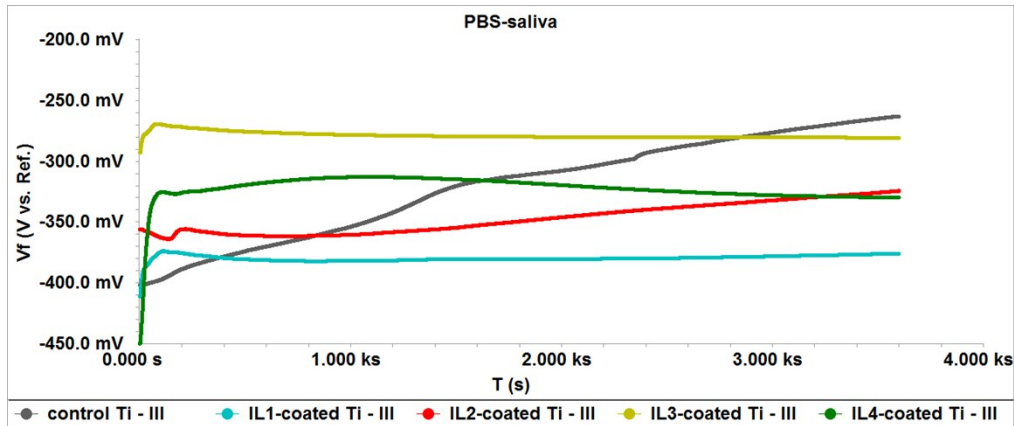

Figure 6. OCP of control Ti – III and IL-coated III samples in PBS-saliva.

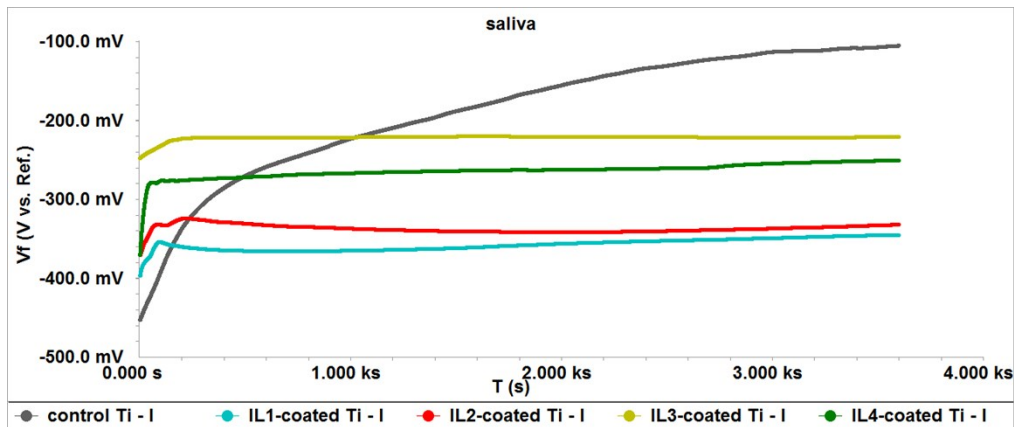

Figure 7. OCP of control Ti – I and IL-coated I samples in saliva.

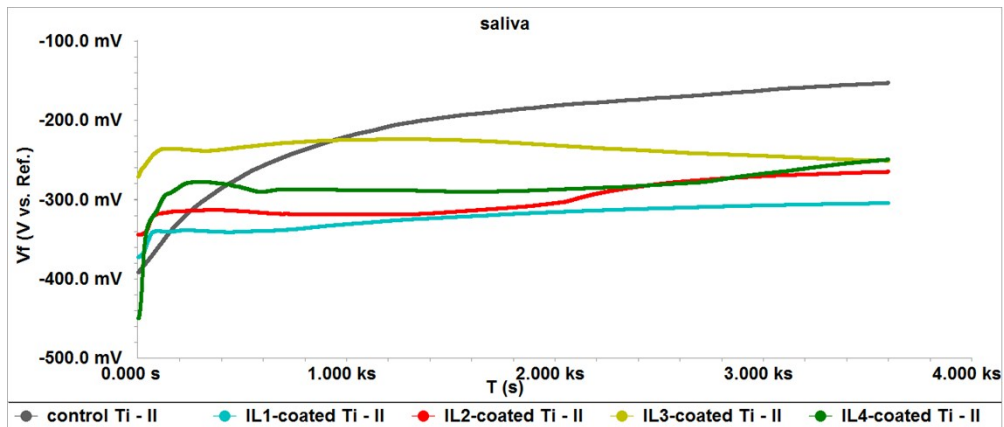

Figure 8. OCP of control Ti – II and IL-coated II samples in saliva.

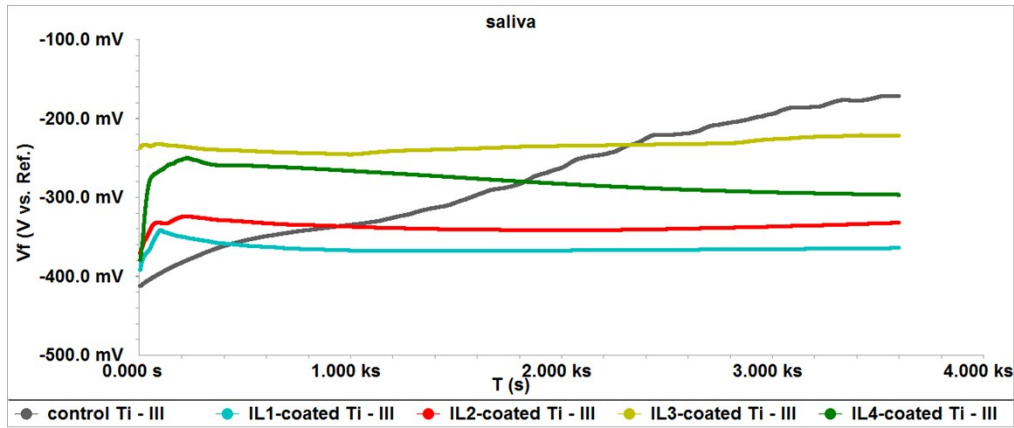

Figure 9. OCP of control Ti – III and IL-coated III samples in saliva.

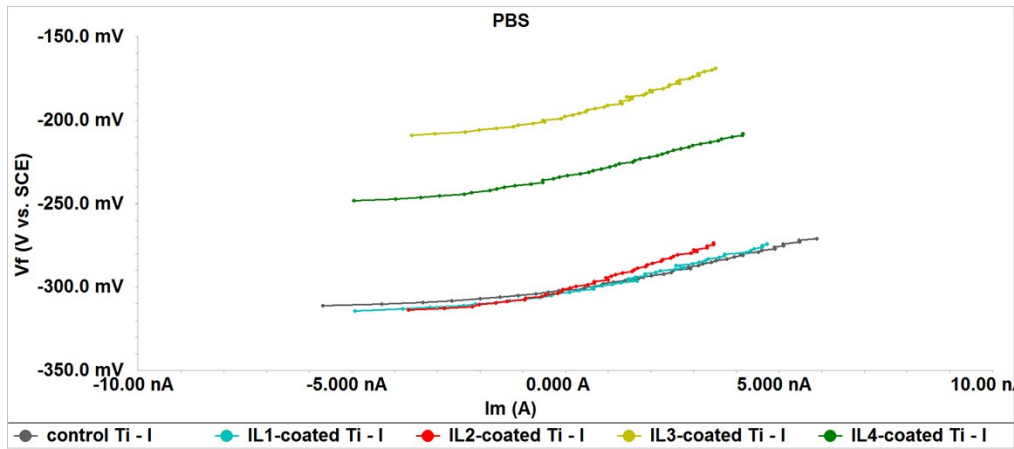

Figure 10. LPR of control Ti – I and IL-coated I samples in PBS.

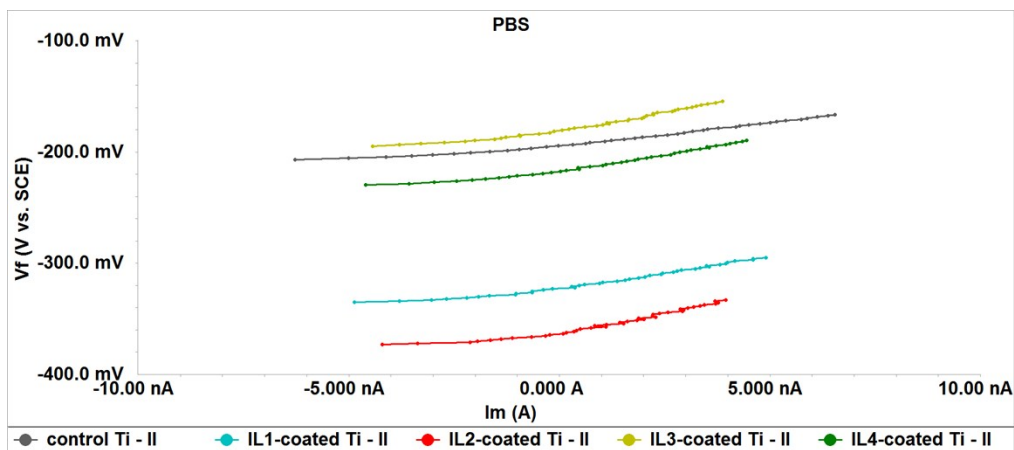

Figure 11. LPR of control Ti – II and IL-coated II samples in PBS.

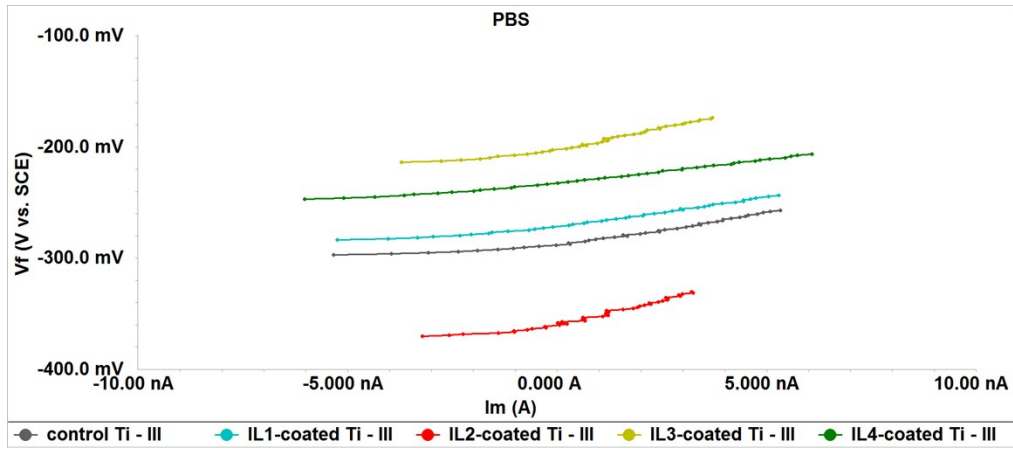

**Figure 12.** LPR of control Ti – III and IL-coated III samples in PBS.

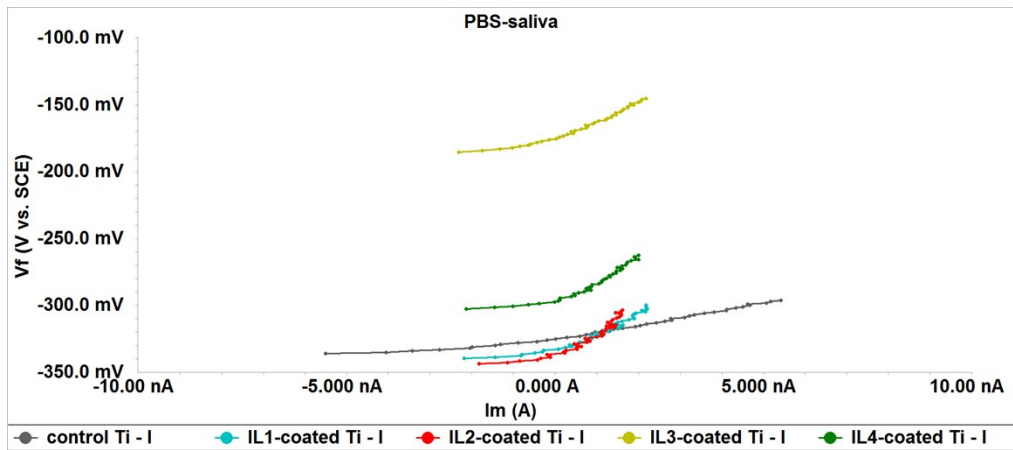

**Figure 13.** LPR of control Ti – I and IL-coated I samples in PBS-saliva.

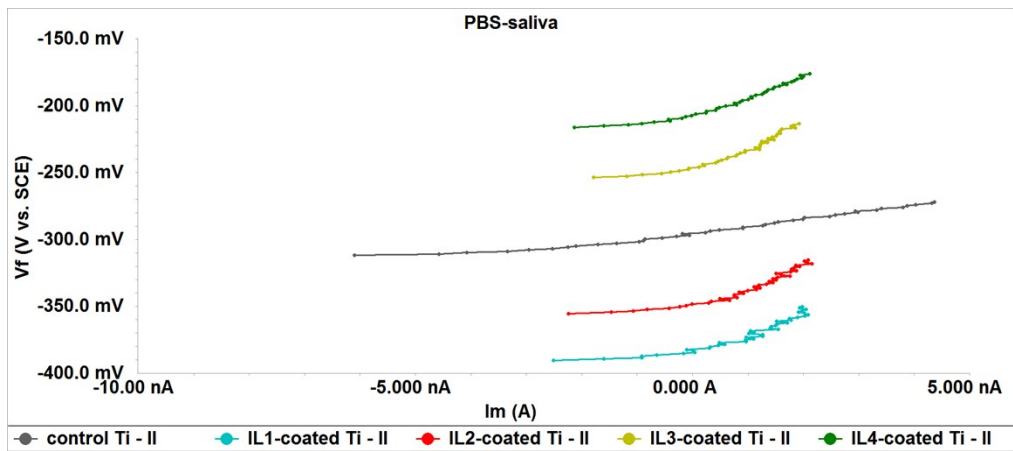

**Figure 14.** LPR of control Ti – II and IL-coated II samples in PBS-saliva.

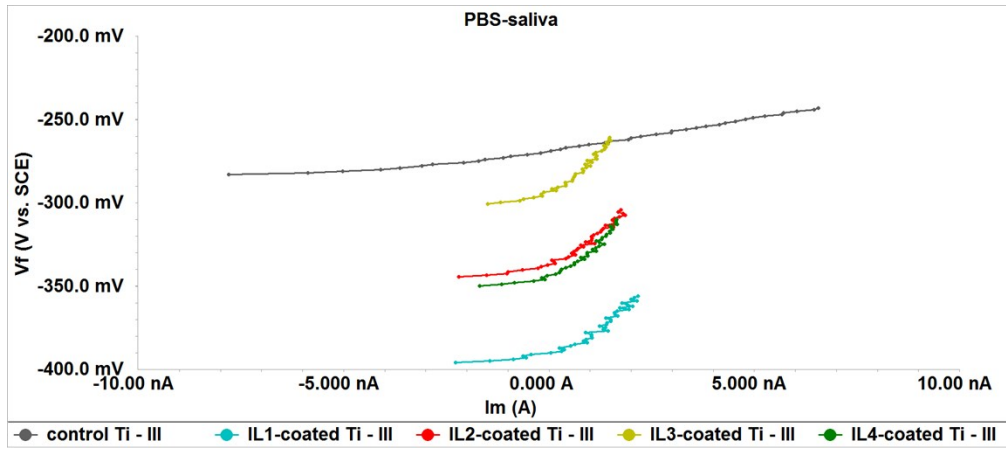

Figure 15. LPR of control Ti – III and IL-coated III samples in PBS-saliva.

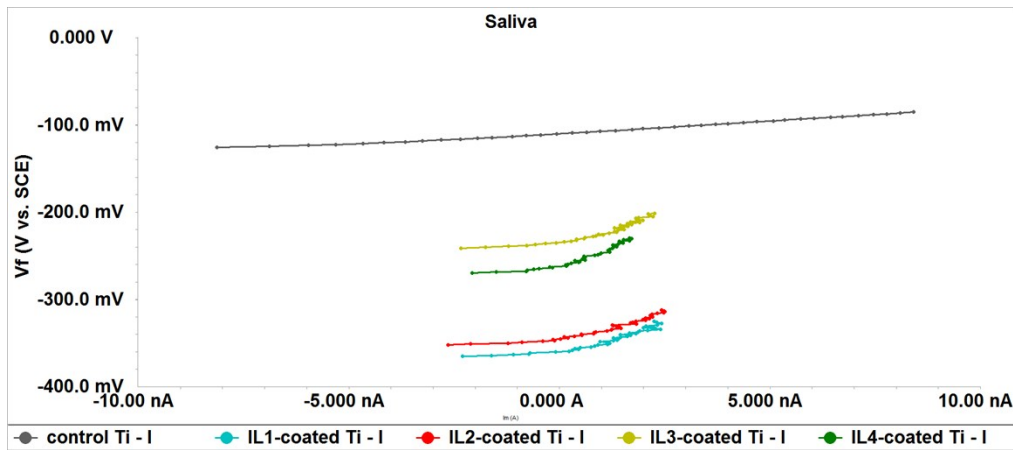

Figure 16. LPR of control Ti – I and IL-coated I samples in saliva.

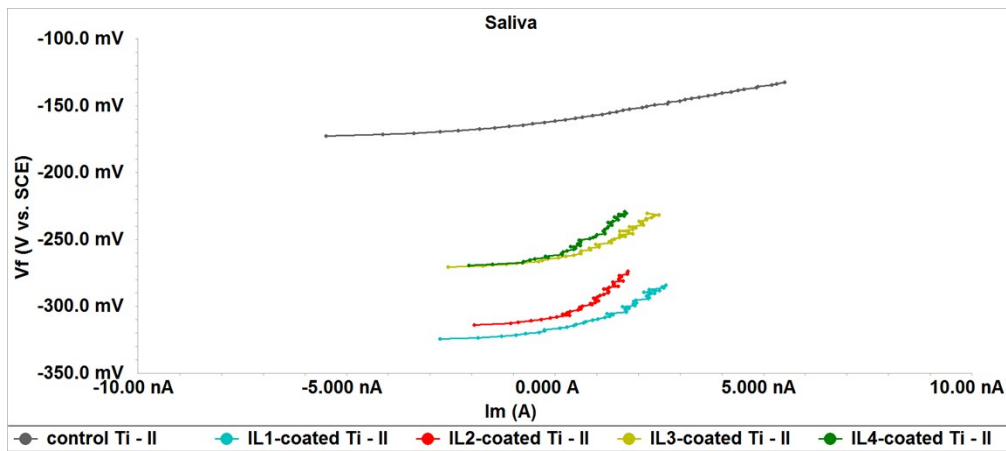

Figure 17. LPR of control Ti – II and IL-coated II samples in saliva.

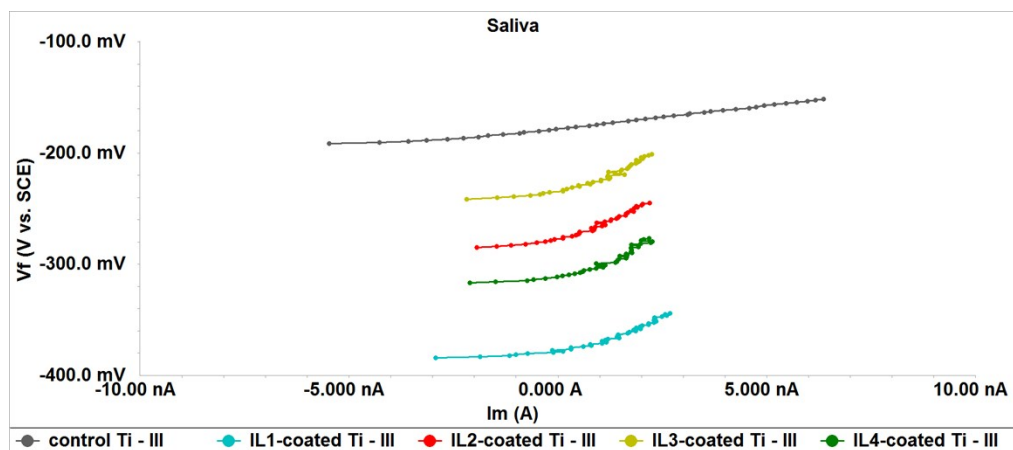

Figure 18. LPR of control Ti – III and IL-coated III samples in saliva.

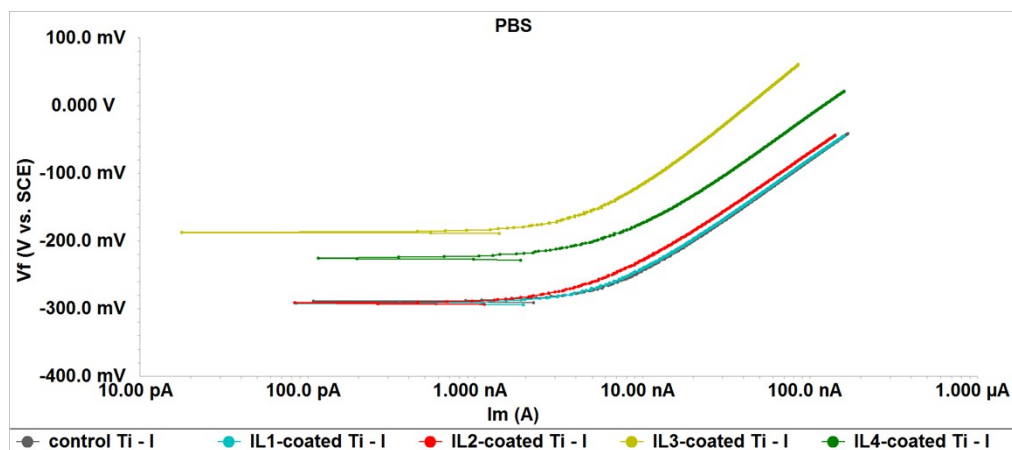

Figure 19. Anodic Tafel of control Ti – I and IL-coated I samples in PBS.

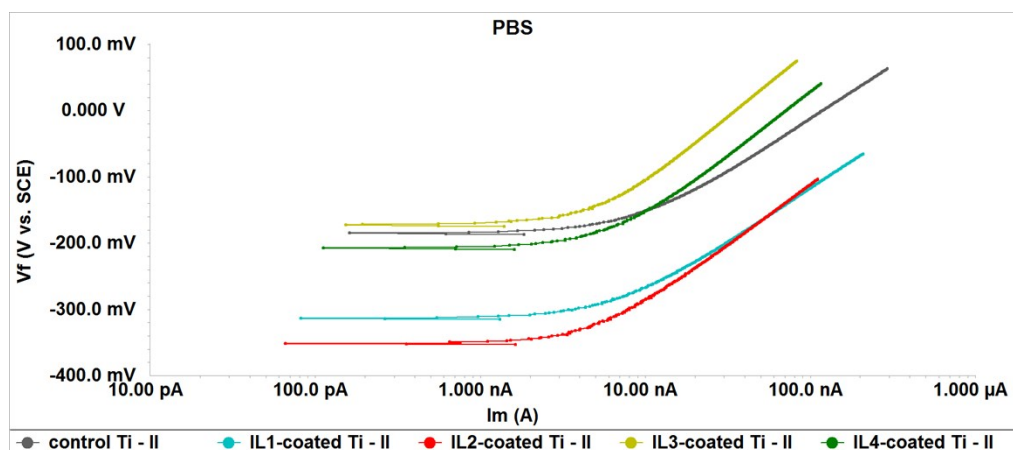

Figure 20. Anodic Tafel of control Ti – II and IL-coated II samples in PBS.



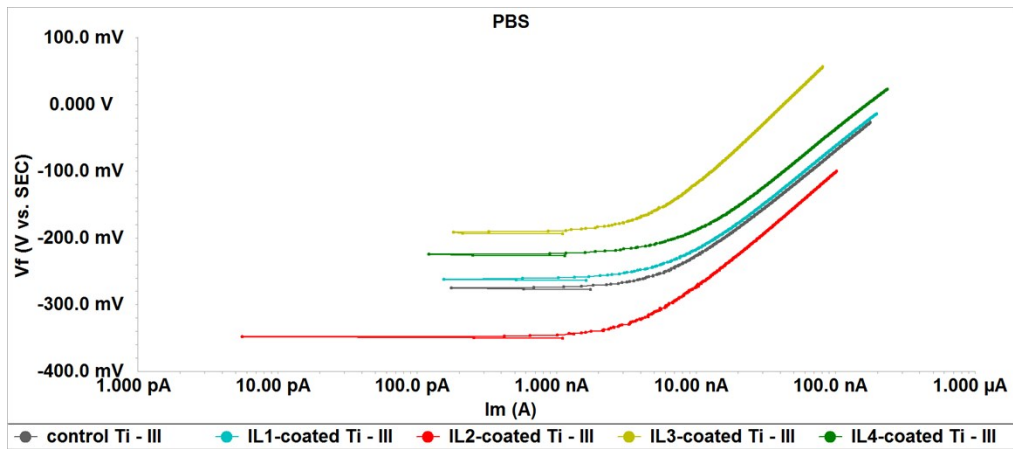

**Figure 21.** Anodic Tafel of control Ti – III and IL-coated III samples in PBS.

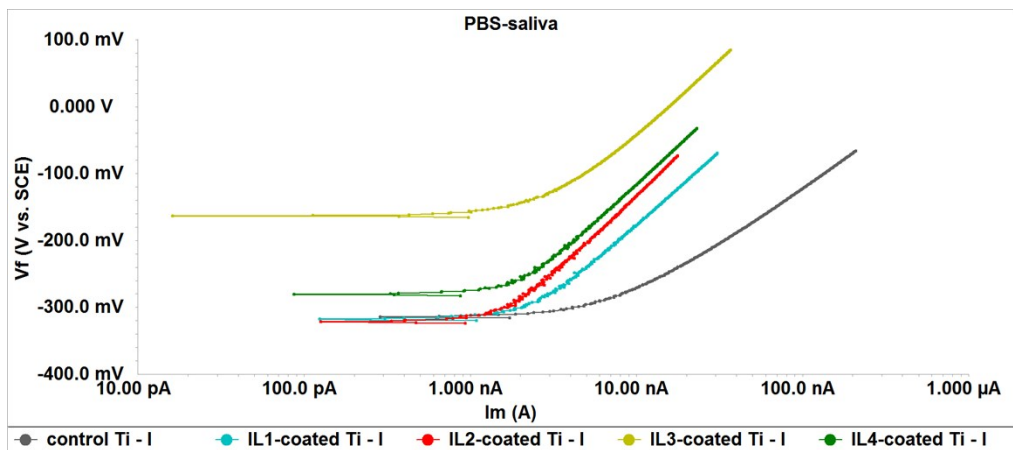

**Figure 22.** Anodic Tafel of control Ti – I and IL-coated I samples in PBS-saliva.

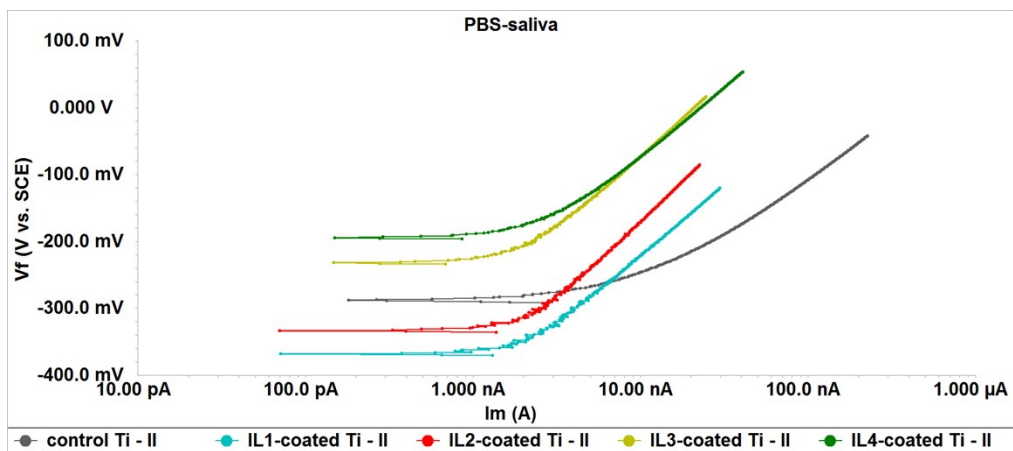

**Figure 23.** Anodic Tafel of control Ti – II and IL-coated II samples in PBS-saliva.

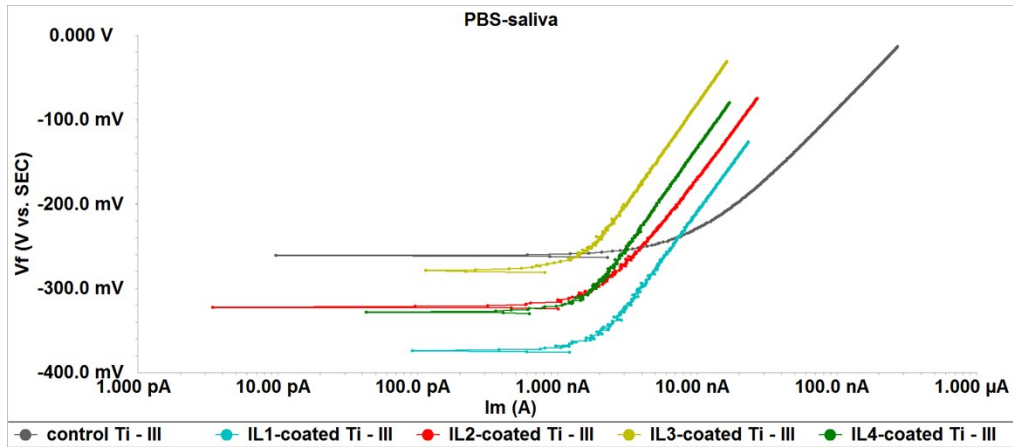

Figure 24. Anodic Tafel of control Ti – III and IL-coated III samples in PBS-saliva.

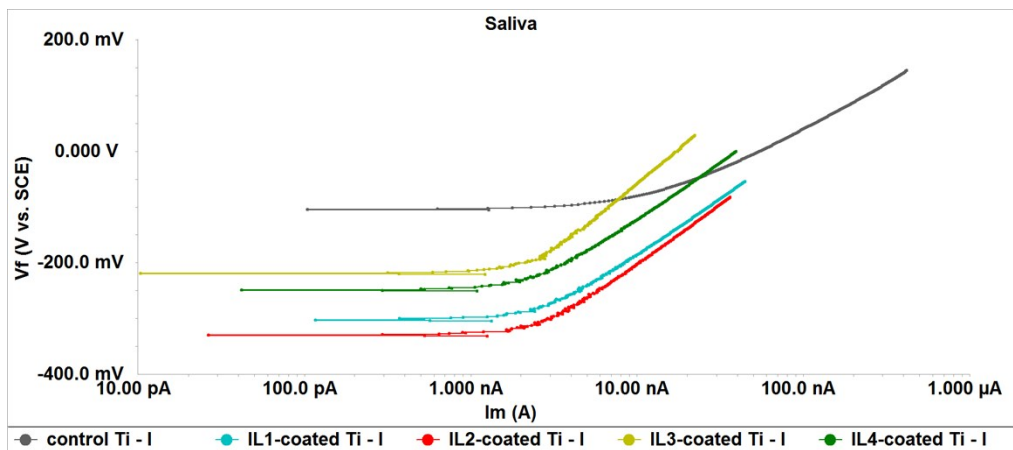

Figure 25. Anodic Tafel of control Ti – I and IL-coated I samples in saliva.

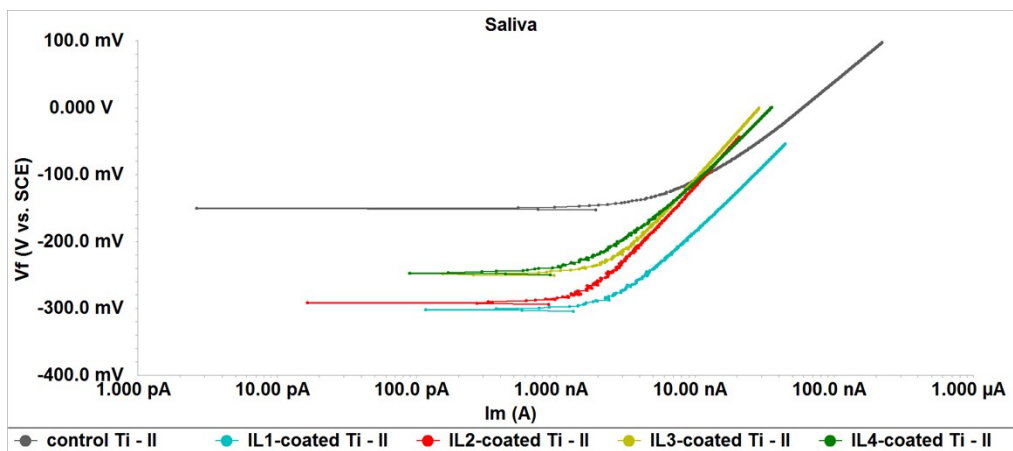

Figure 26. Anodic Tafel of control Ti – II and IL-coated II samples in saliva.

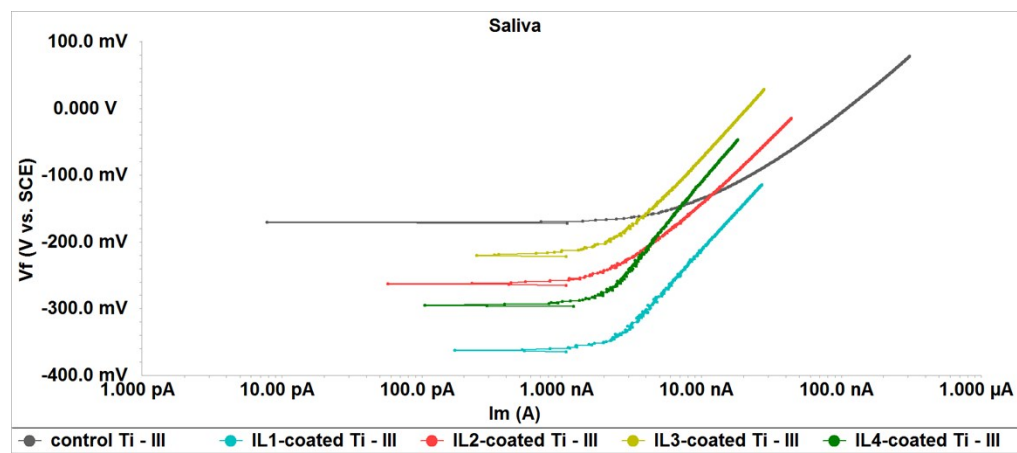

**Figure 27.** Anodic Tafel of control Ti – III and IL-coated III samples in saliva.
